# Supplementary material for: Systematic assessment of tissue dissociation and storage biases in single-cell and single-nucleus RNA-seq workflows
Source: PubMed Central journal article supplement (PMC7265231; doi:10.1186/s13059-020-02048-6), 2020-06-02
Supplement: 13059_2020_2048_MOESM2_ESM.pdf [file 13059_2020_2048_MOESM2_ESM.pdf]

# Fig. S1

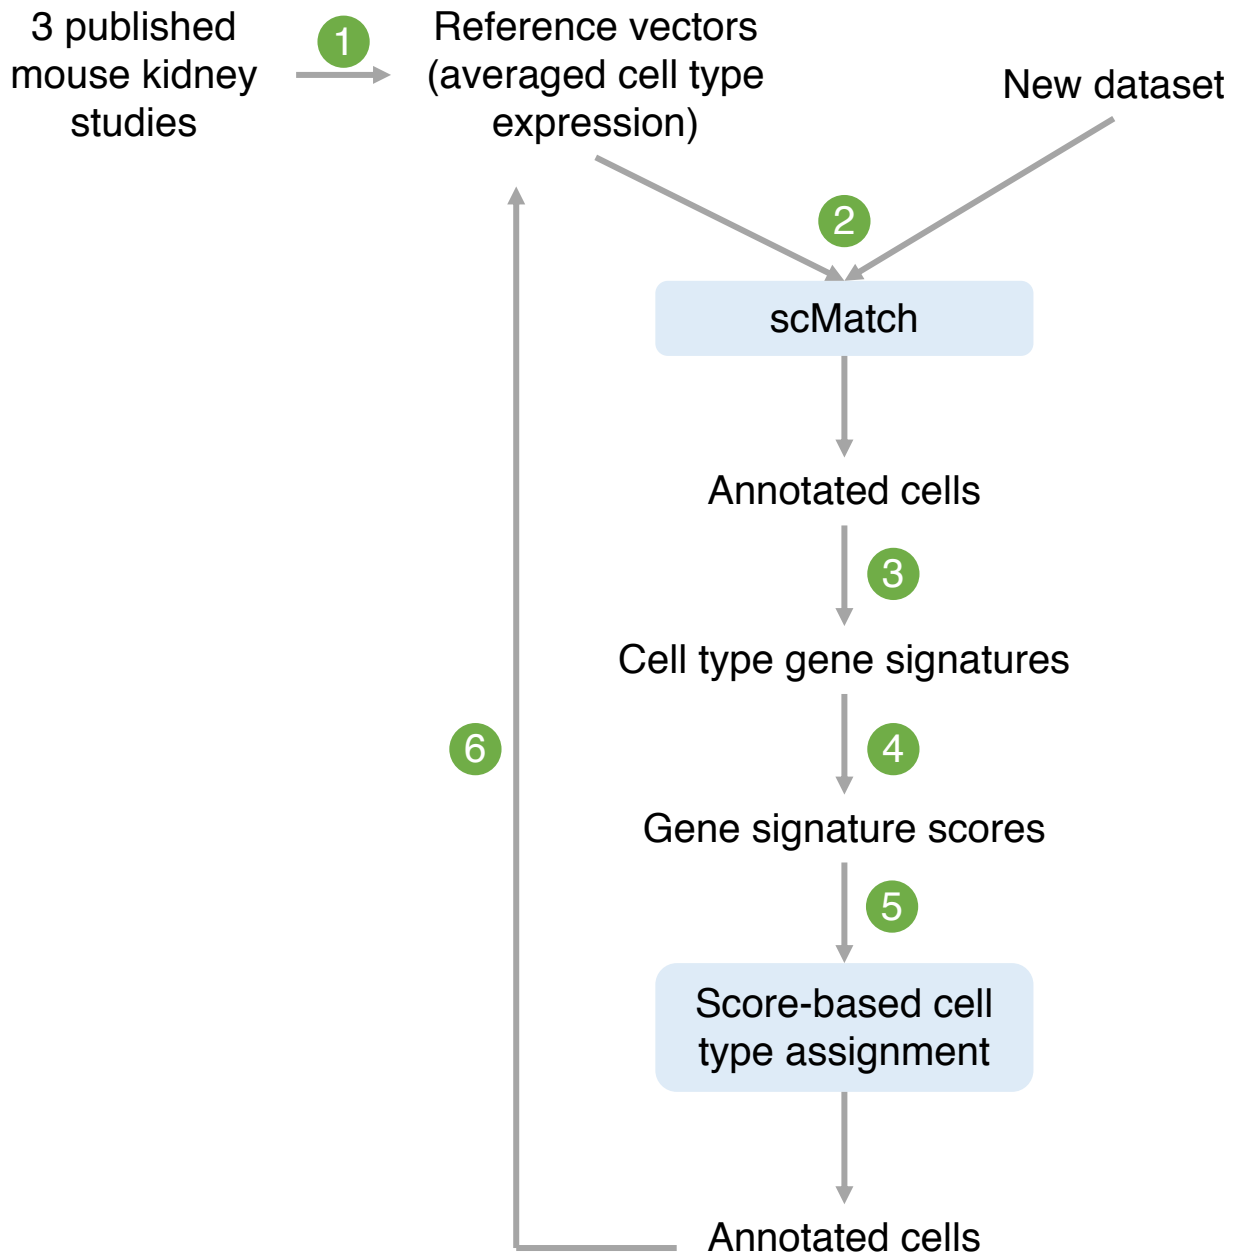

Cell annotation procedure. See **Methods** for more details.

# Fig. S2

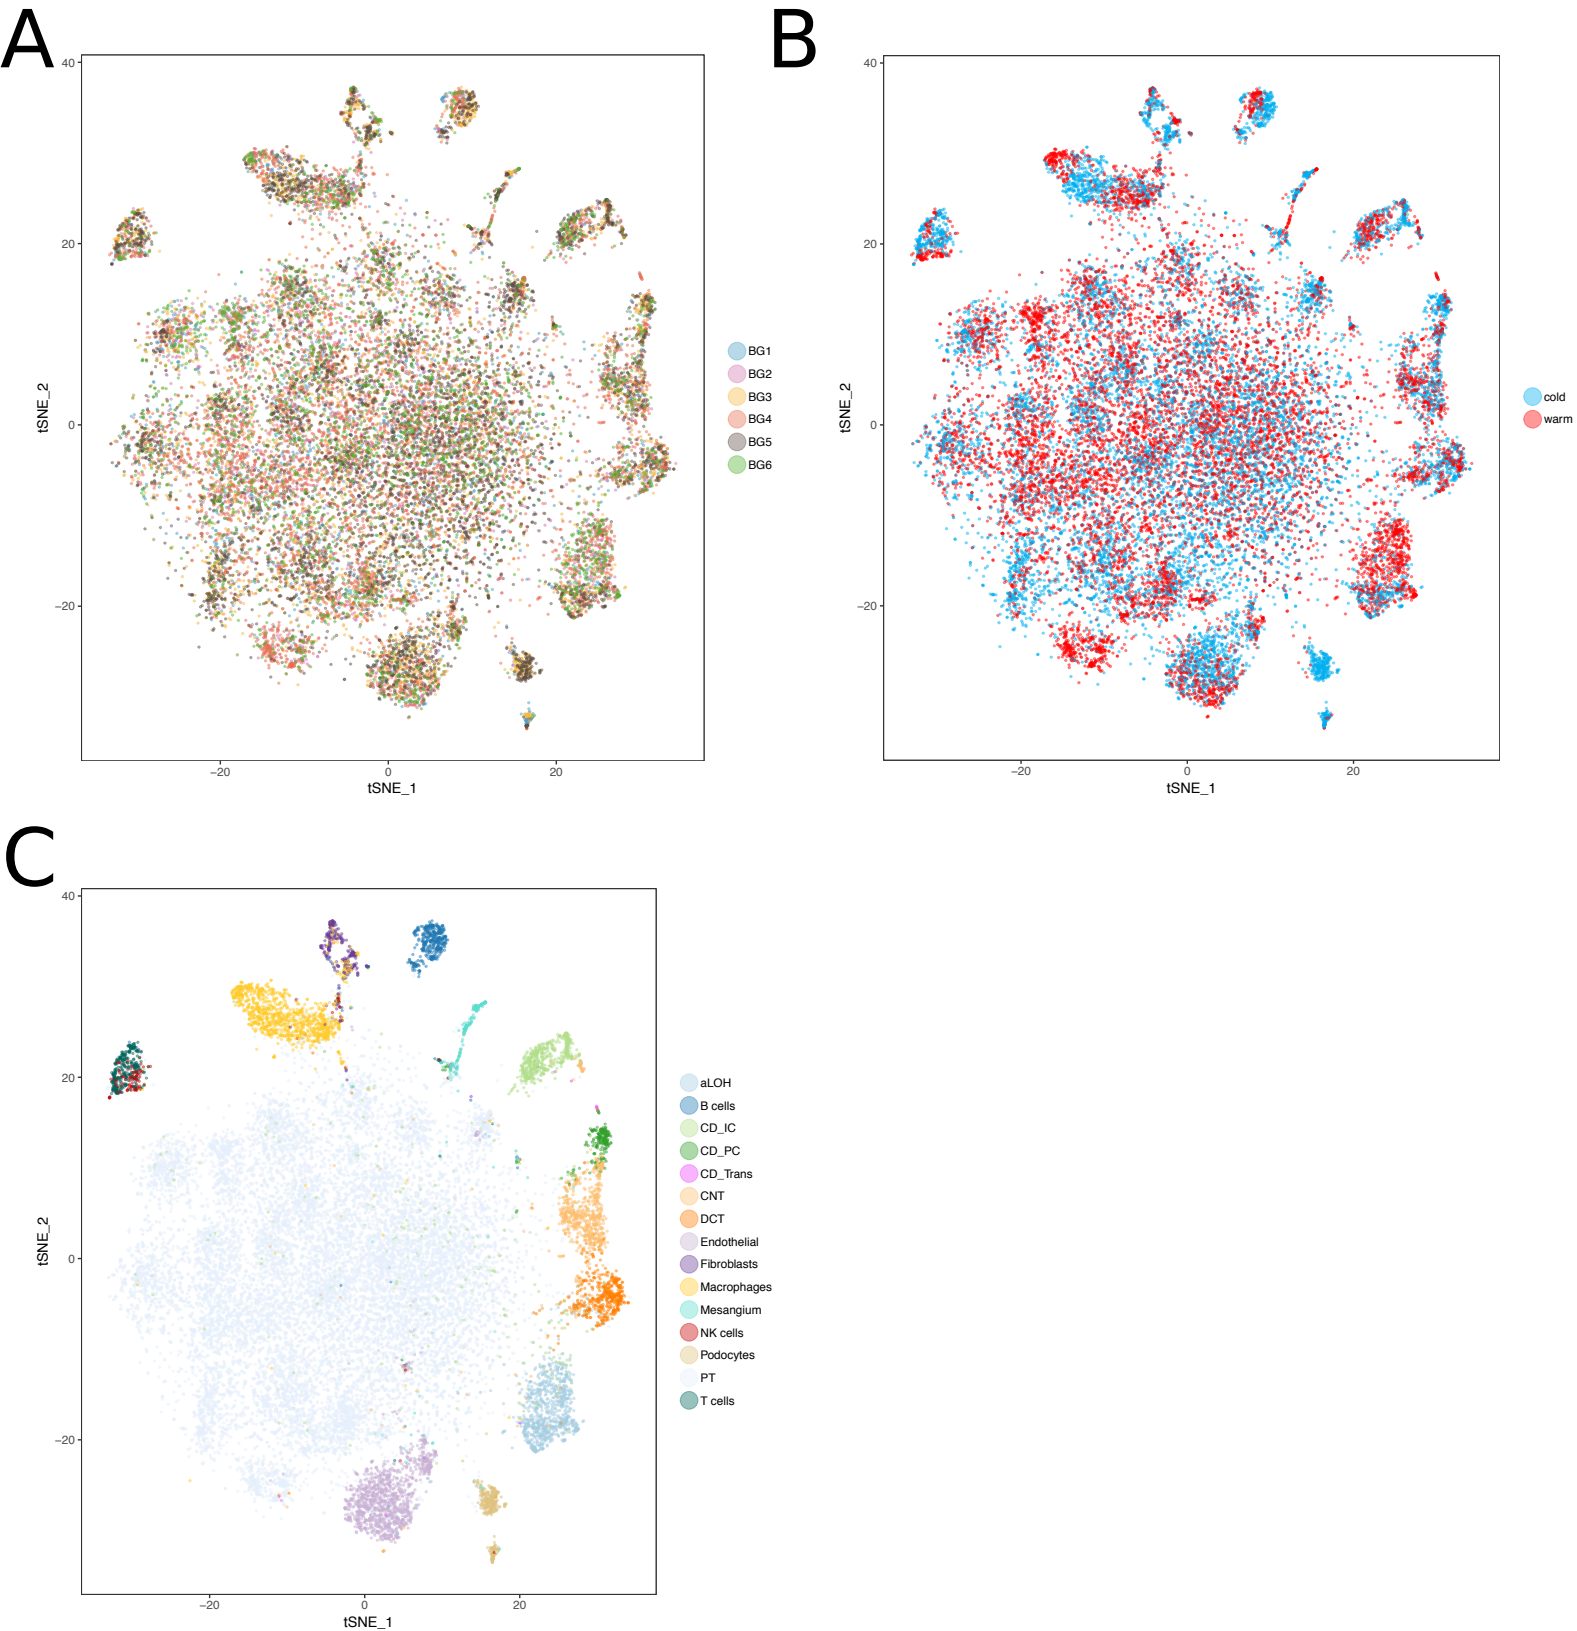

TSNE plots showing freshly profiled cells from cold- and warm-dissociated kidneys coloured by **a)** library, **b)** dissociation protocol, **c)** inferred cell type.

aLOH: ascending loop of Henle; CD\_IC: intercalated cells of collecting duct; CD\_PC: principal cells of collecting duct; CD\_Trans: transitional cells of collecting duct; CNT: connecting tubule; DCT: distal convoluted tubule; PT: proximal tubule.

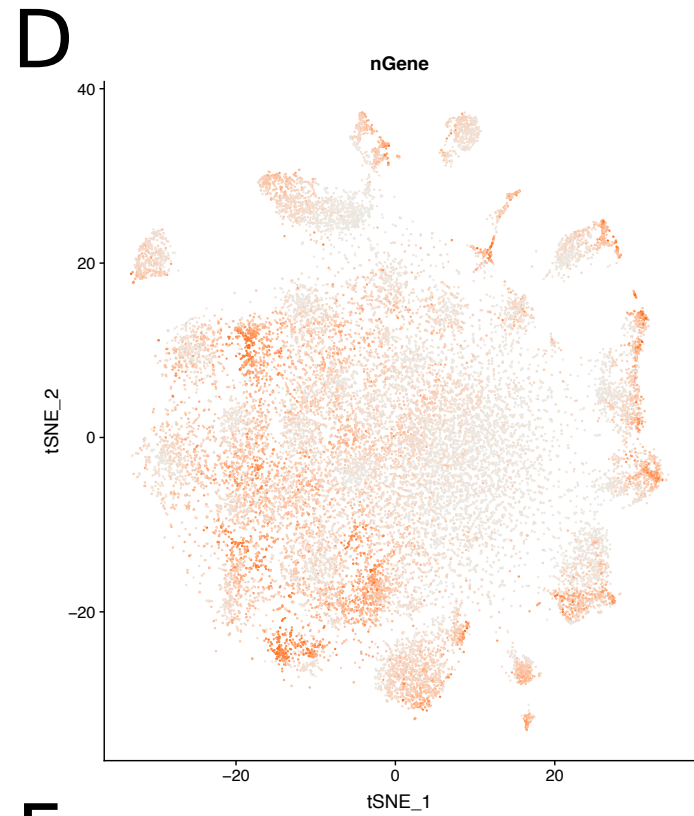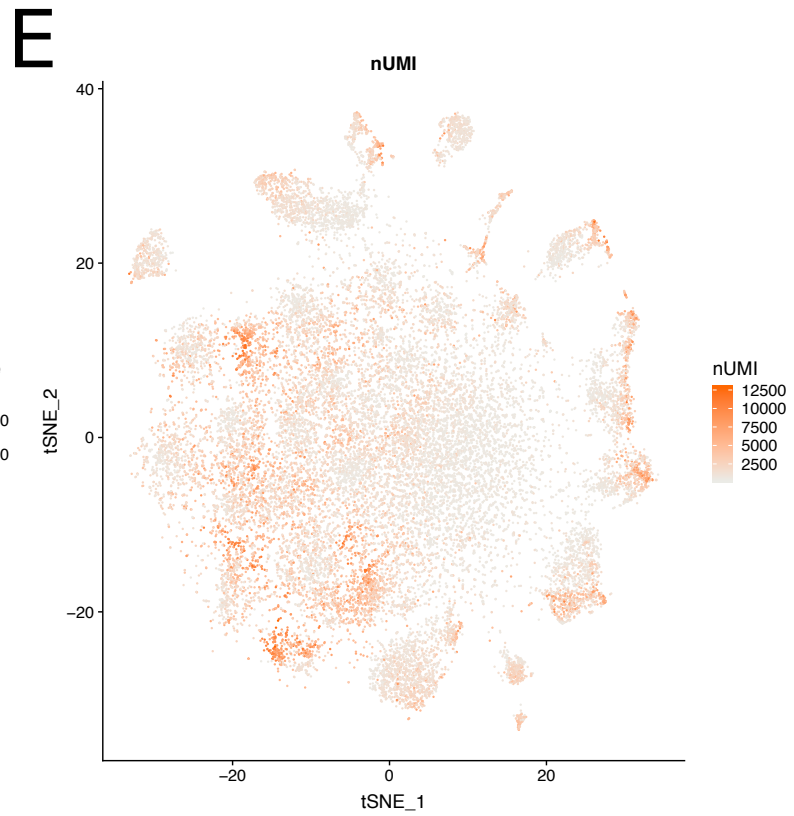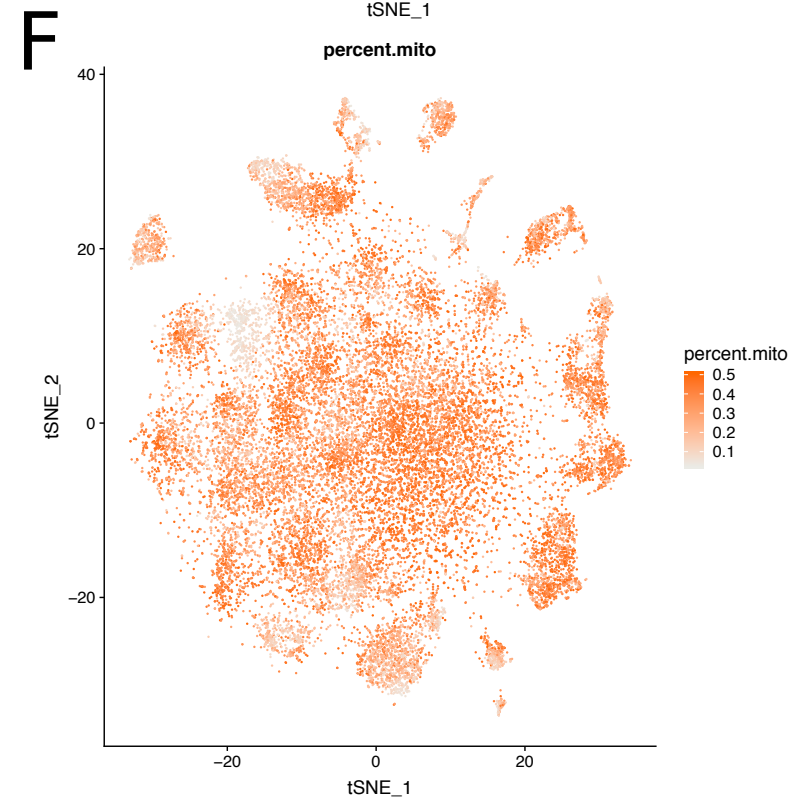

TSNE plots showing freshly profiled cells from cold- and warm-dissociated kidneys coloured by **d**) number of detected genes, **e**) number of UMIs, **f**) fraction of reads mapped to mitochondrial genes.

# Fig. S3

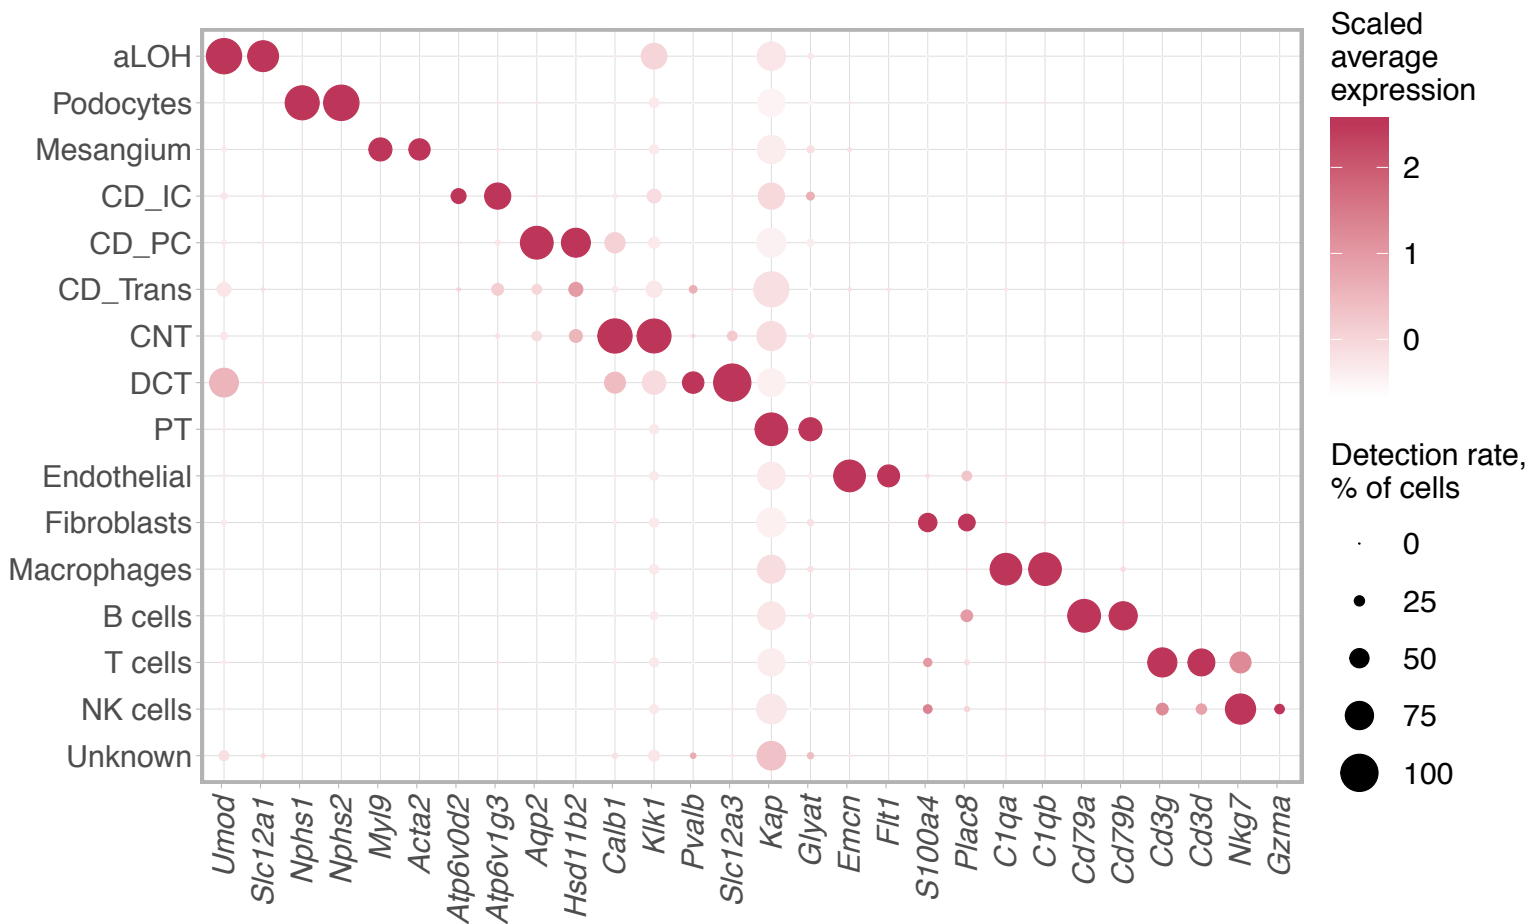

Expression and detection levels of selected marker genes.

aLOH: ascending loop of Henle; CD\_IC: intercalated cells of collecting duct; CD\_PC: principal cells of collecting duct; CD\_Trans: transitional cells of collecting duct; CNT: connecting tubule; DCT: distal convoluted tubule; PT: proximal tubule.

# Fig. S4

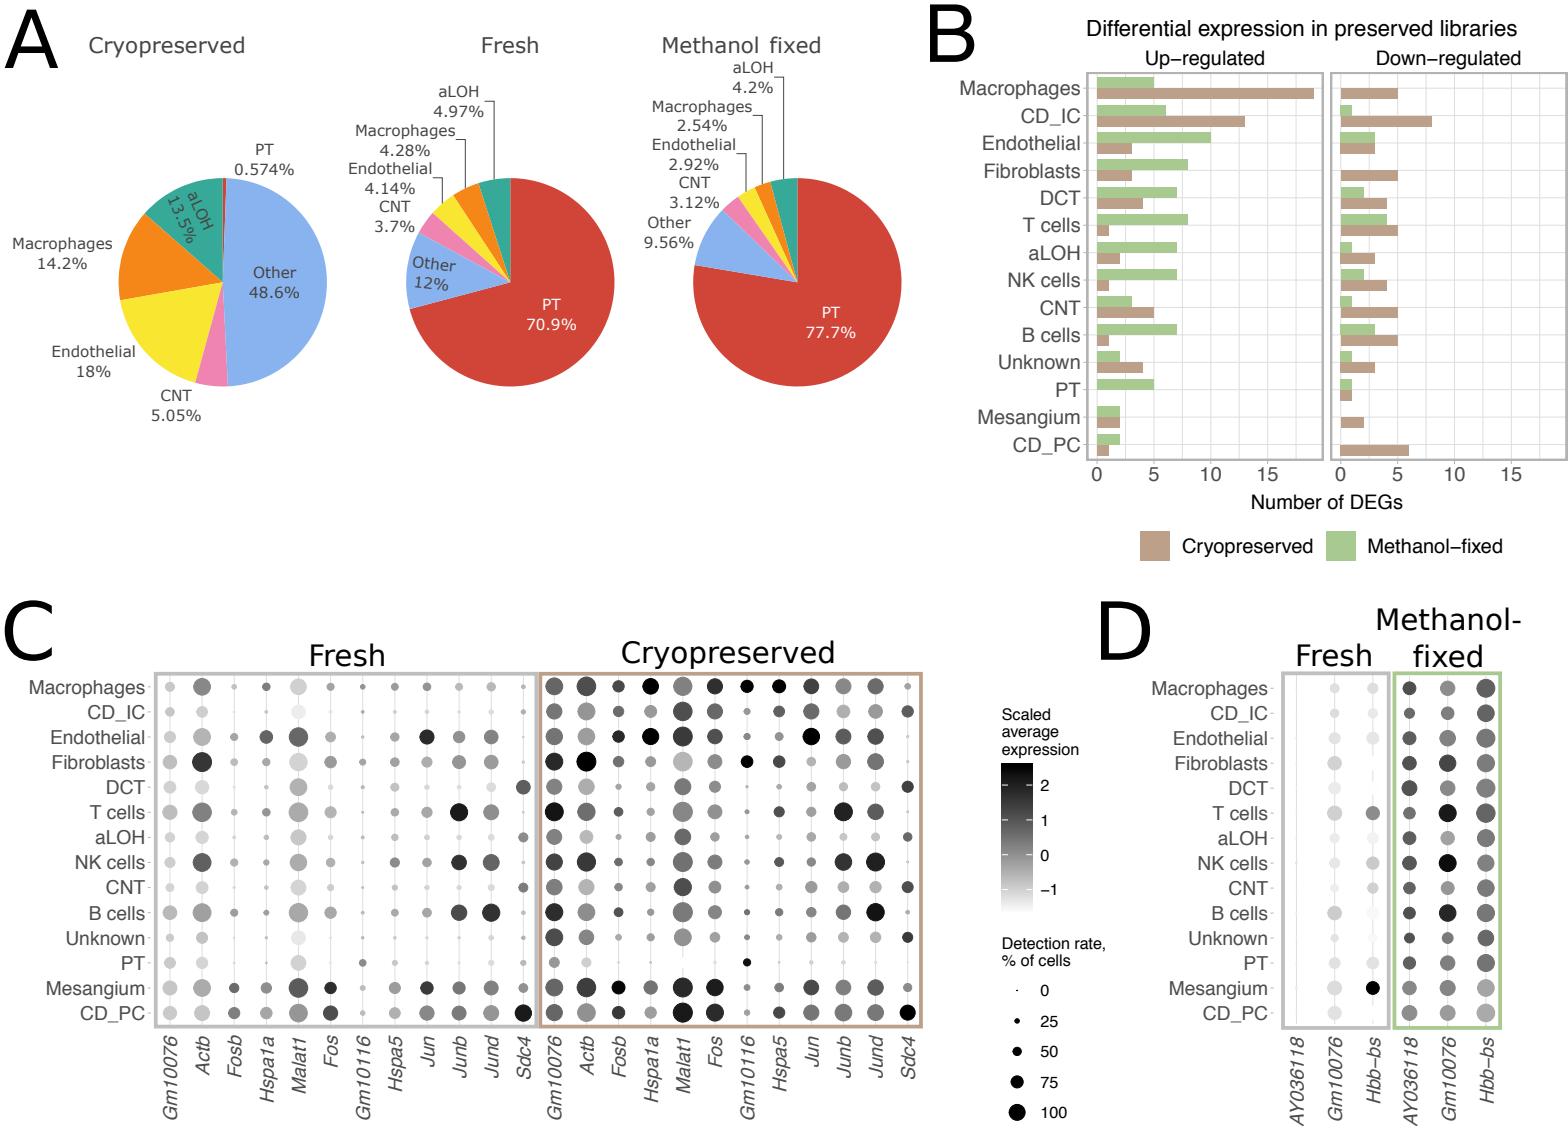

Cell preservation protocol performance in warm-dissociated samples. **a)** Cell type composition of fresh and preserved warm-dissociated samples. **b)** Number of DEGs detected between preserved and freshly profiled aliquots. Seurat Wilcoxon test with  $\log_{FC} = 1$ , min detection rate 0.5,  $FDR < 0.05$  as thresholds. **c)** Expression and detection rates of DEGs with higher expression in cryopreserved samples in at least two cell types. **d)** Expression and detection rates of DEGs with higher expression in methanol-fixed samples in at least nine cell types.

aLOH: ascending loop of Henle; CD\_IC: intercalated cells of collecting duct; CD\_PC: principal cells of collecting duct; CD\_Trans: transitional cells of collecting duct; CNT: connecting tubule; DCT: distal convoluted tubule; PT: proximal tubule.

# Fig. S5

## Cold dissociation

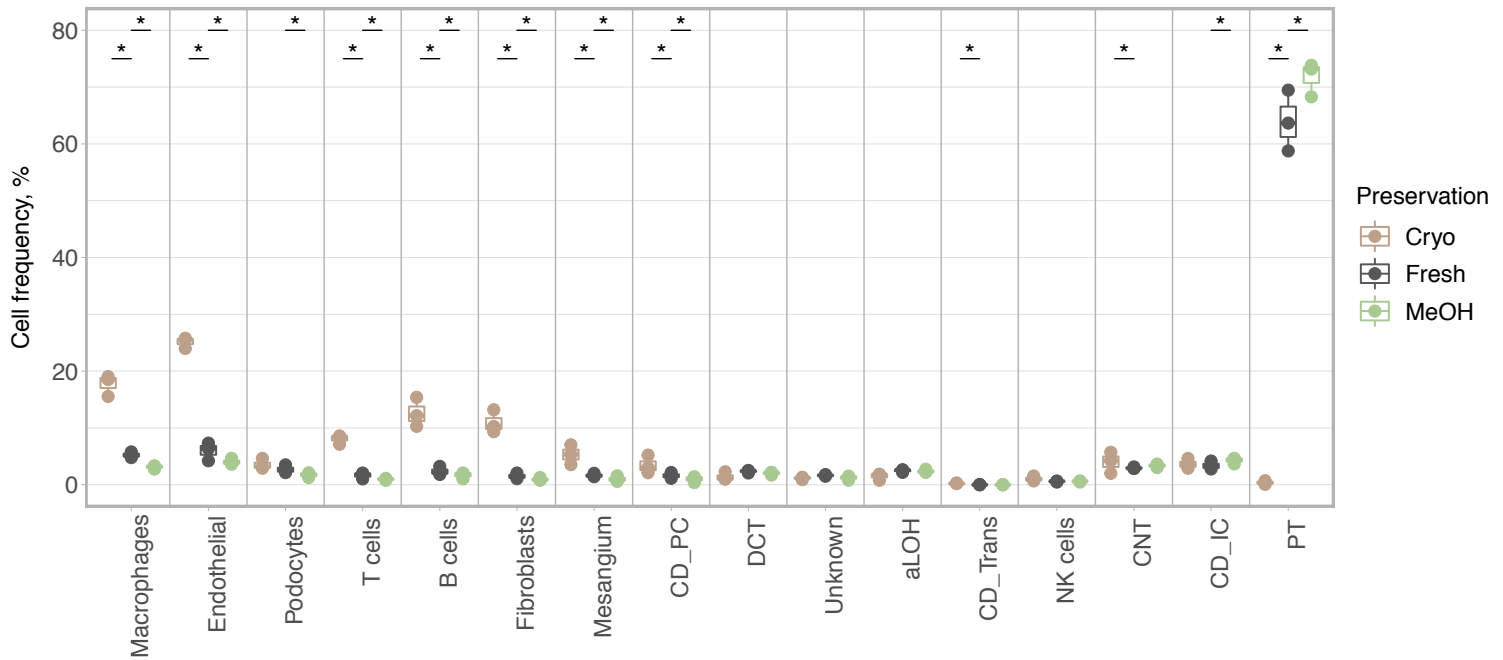

## Warm dissociation

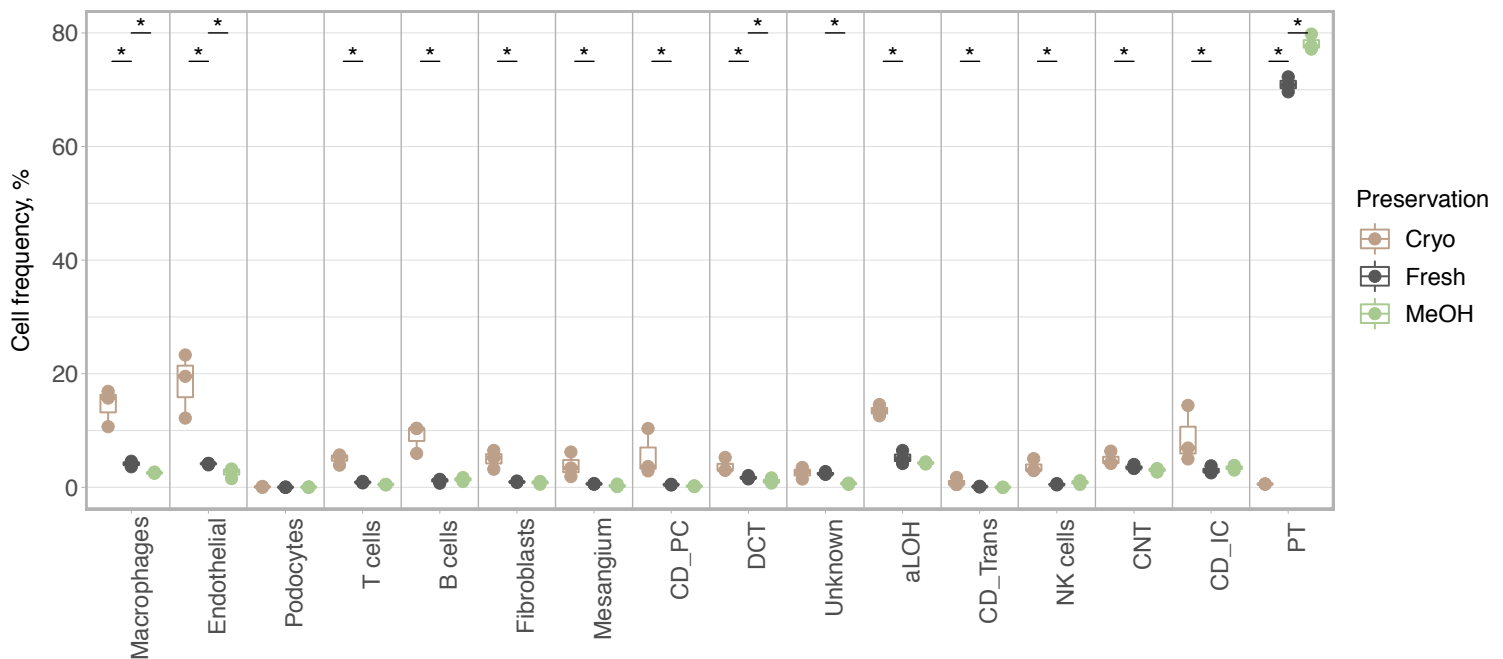

Cell type composition of fresh and preserved kidneys. Three biological replicates are shown per condition. Asterisks denote two-sided chi-square test p-value < 0.001.

aLOH: ascending loop of Henle; CD\_IC: intercalated cells of collecting duct; CD\_PC: principal cells of collecting duct; CD\_Trans: transitional cells of collecting duct; CNT: connecting tubule; DCT: distal convoluted tubule; PT: proximal tubule.

# Fig. S6

## Cold dissociation

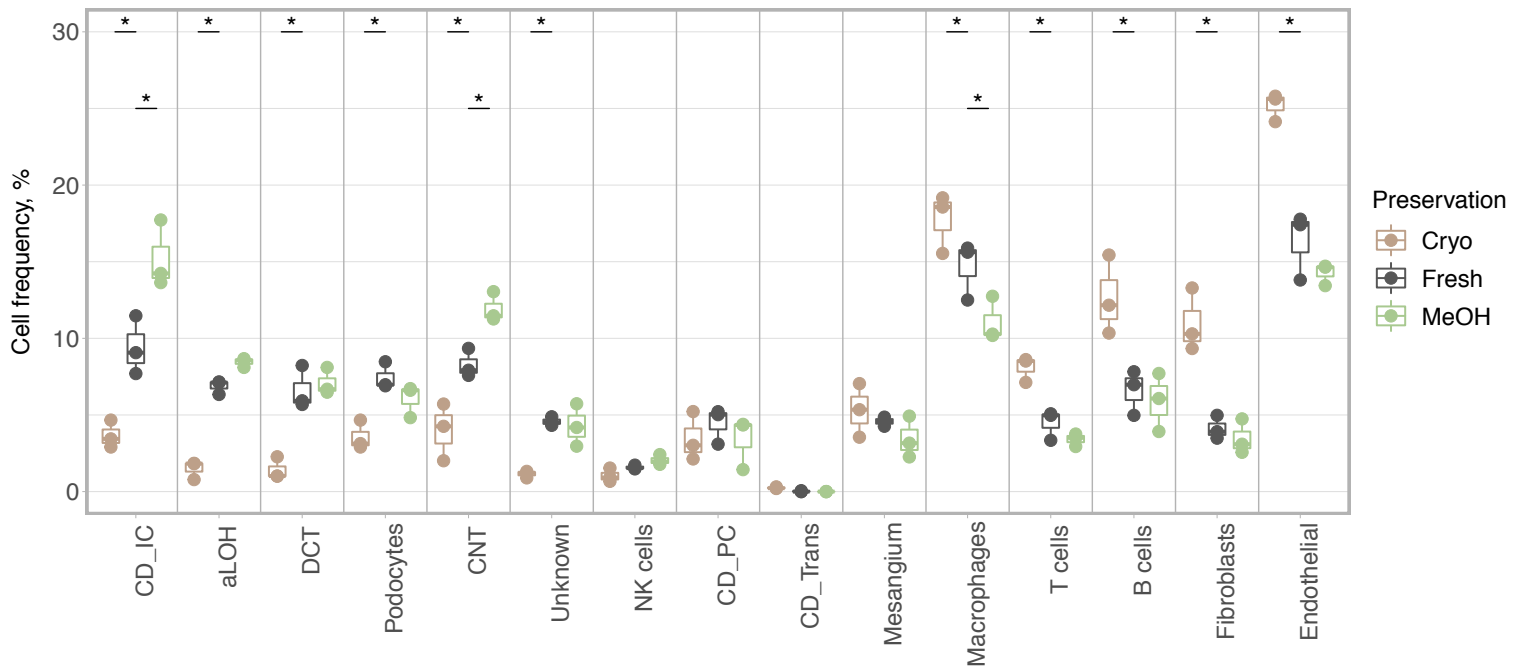

## Warm dissociation

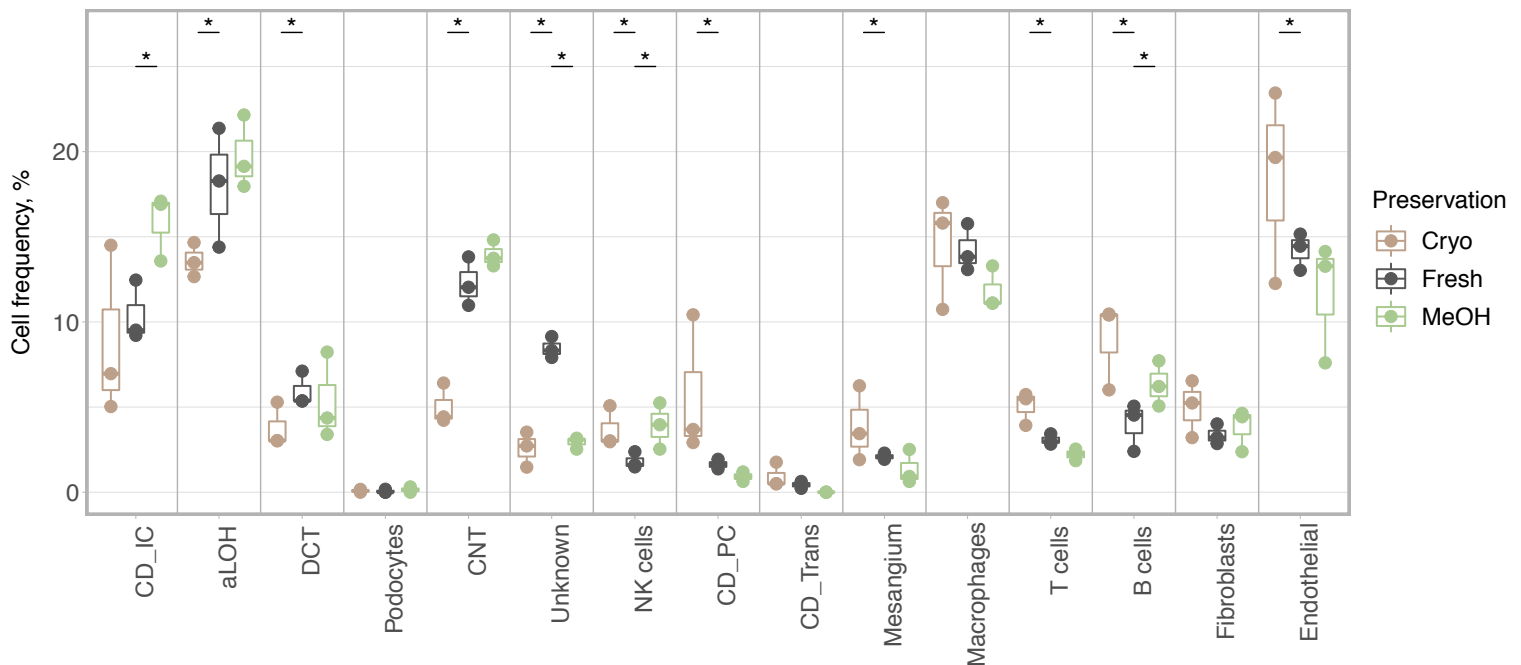

Cell type composition of non-proximal tubule cells in fresh and preserved kidneys. Three biological replicates are shown per condition. Asterisks denote two-sided chi-square test p-value < 0.001.

aLOH: ascending loop of Henle; CD\_IC: intercalated cells of collecting duct; CD\_PC: principal cells of collecting duct; CD\_Trans: transitional cells of collecting duct; CNT: connecting tubule; DCT: distal convoluted tubule.

# Fig. S7

Cryopreserved

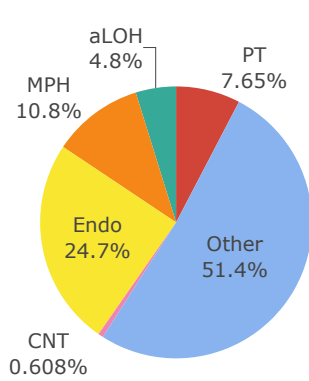

Fresh

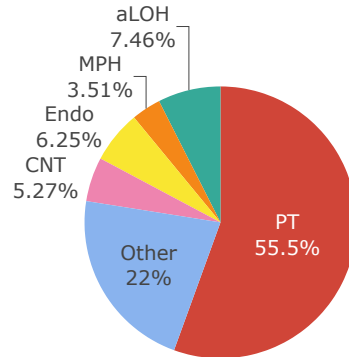

Cell type composition of fresh and cryopreserved cold-dissociated samples in the repeated experiment using Balb/c female mice, 10x v3 chemistry, 2 weeks storage, and 1200g spin.

aLOH: ascending loop of Henle; MPH: macrophages; CNT: connecting tubule; PT: proximal tubule.



# Fig. S8

## A

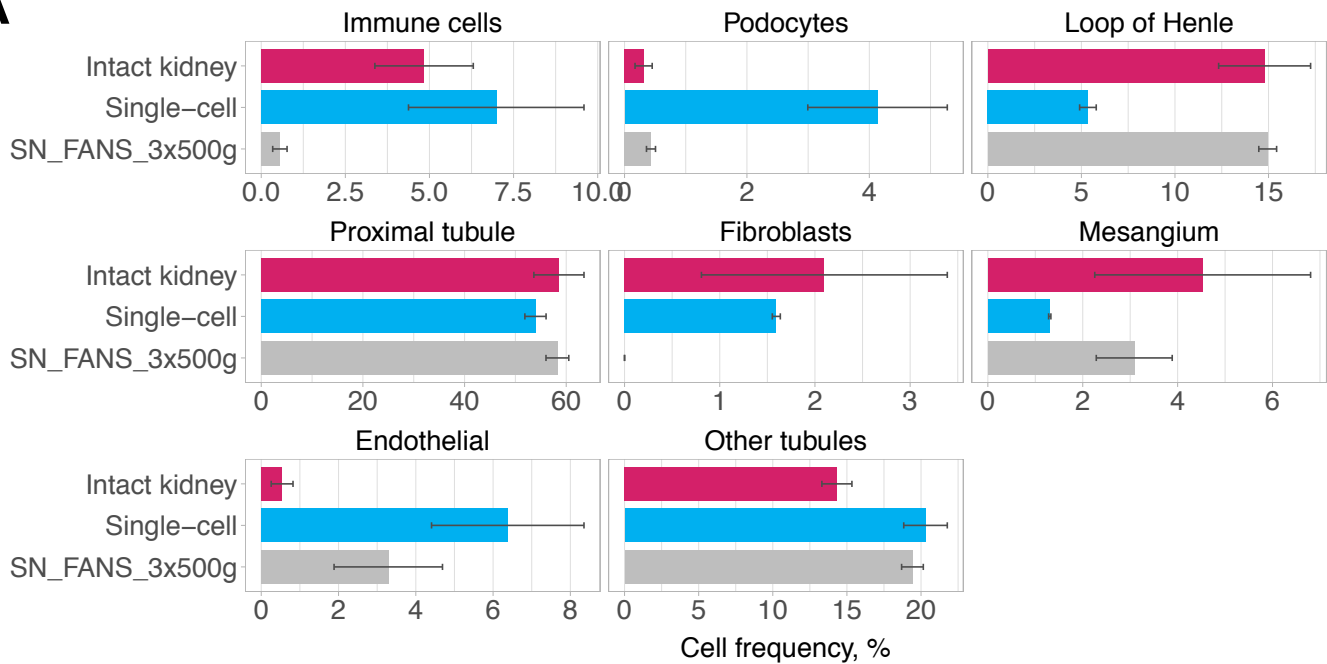

## B

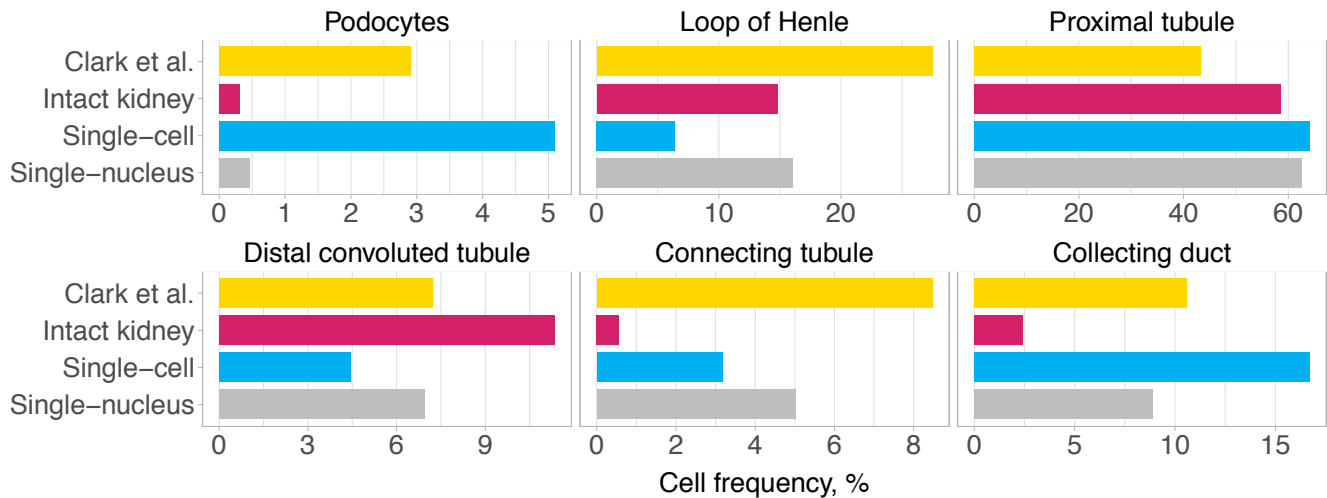

Comparison of single-cell and single-nucleus libraries in Balb/c male mice. **a)** Cell type composition for kidneys from Balb/c male mice. Average percentages for scRNA-seq libraries are shown in blue and for snRNA-seq libraries in grey. BSEQ-sc estimates are shown for bulk RNA-seq of intact kidneys. Error bars are standard error of mean. **b)** Abundance of renal epithelial cell types in Clark *et al.* study in comparison to our data from Balb/c male mice.

# Fig. S9

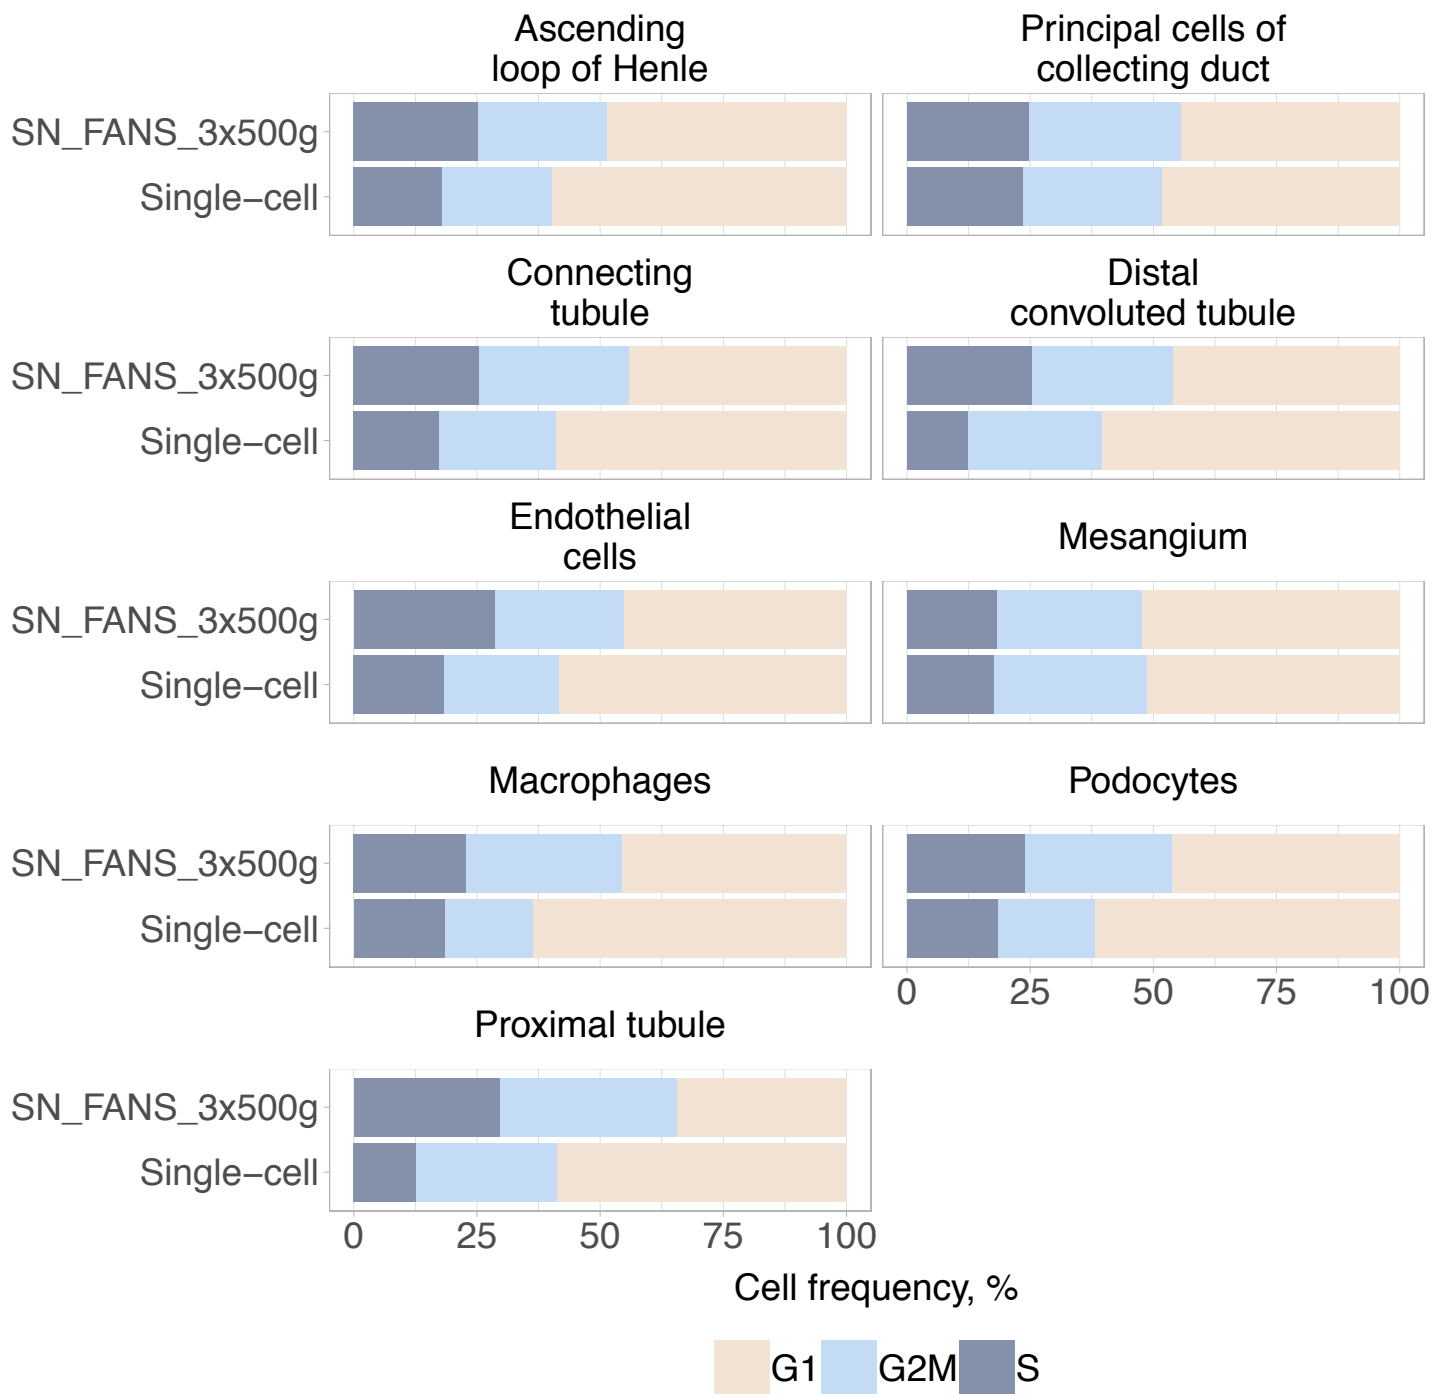

Cell cycle phases inferred in scRNA-seq and snRNA-seq libraries from Balb/c male mice.

# Fig. S10

1<sup>st</sup> gate for nuclei

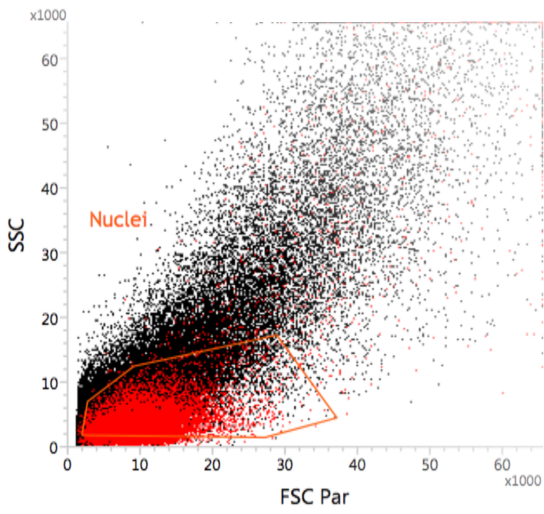

2<sup>nd</sup> gate for singlets

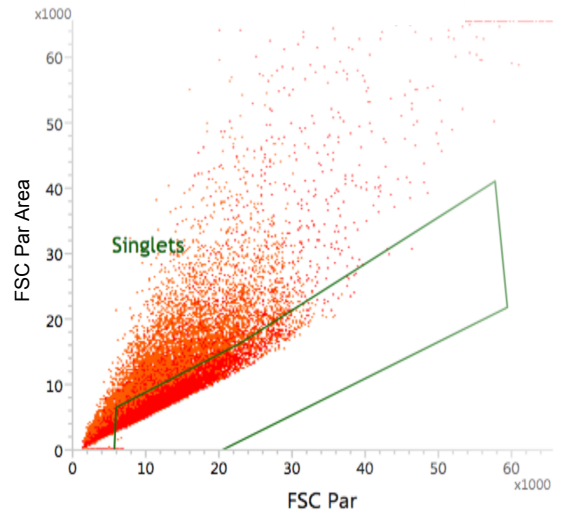

3<sup>rd</sup> gate for DAPI+

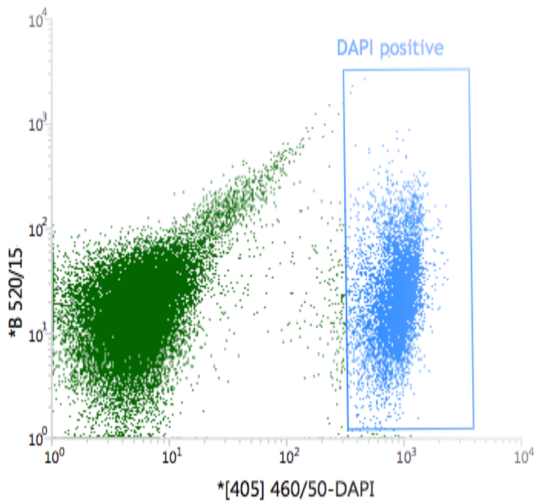

Density plot

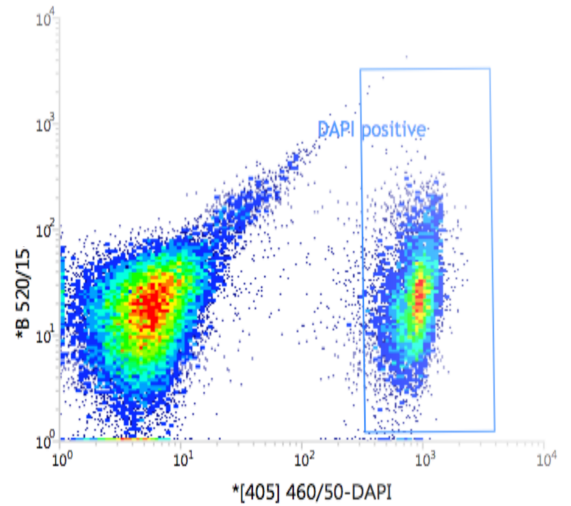

FANS gating strategy.

# Fig. S11

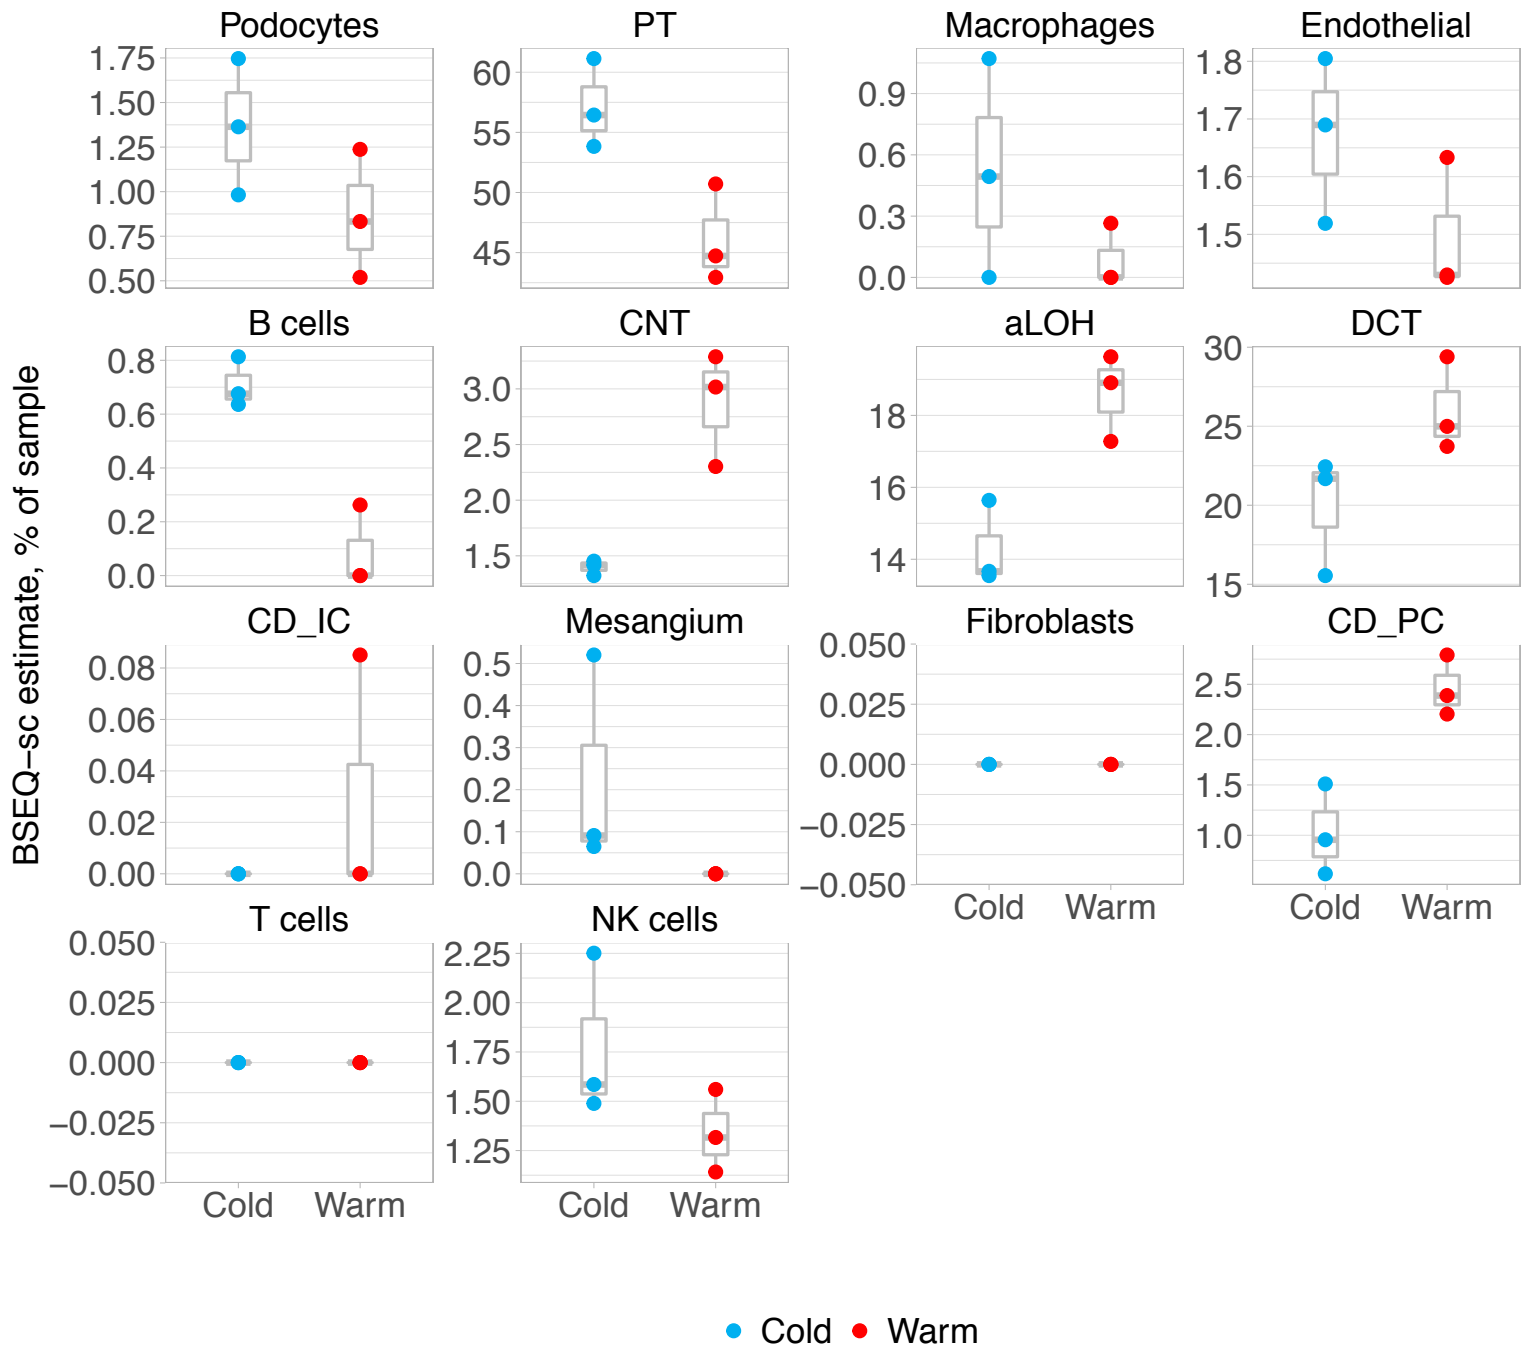

BSEQ-sc deconvolution of bulk RNA-seq profiles of cold- and warm-dissociated kidney single-cell suspensions. Three biological replicates are shown per condition.

aLOH: ascending loop of Henle; CD\_IC: intercalated cells of collecting duct; CD\_PC: principal cells of collecting duct; CNT: connecting tubule; DCT: distal convoluted tubule; PT: proximal tubule.

# Fig. S12

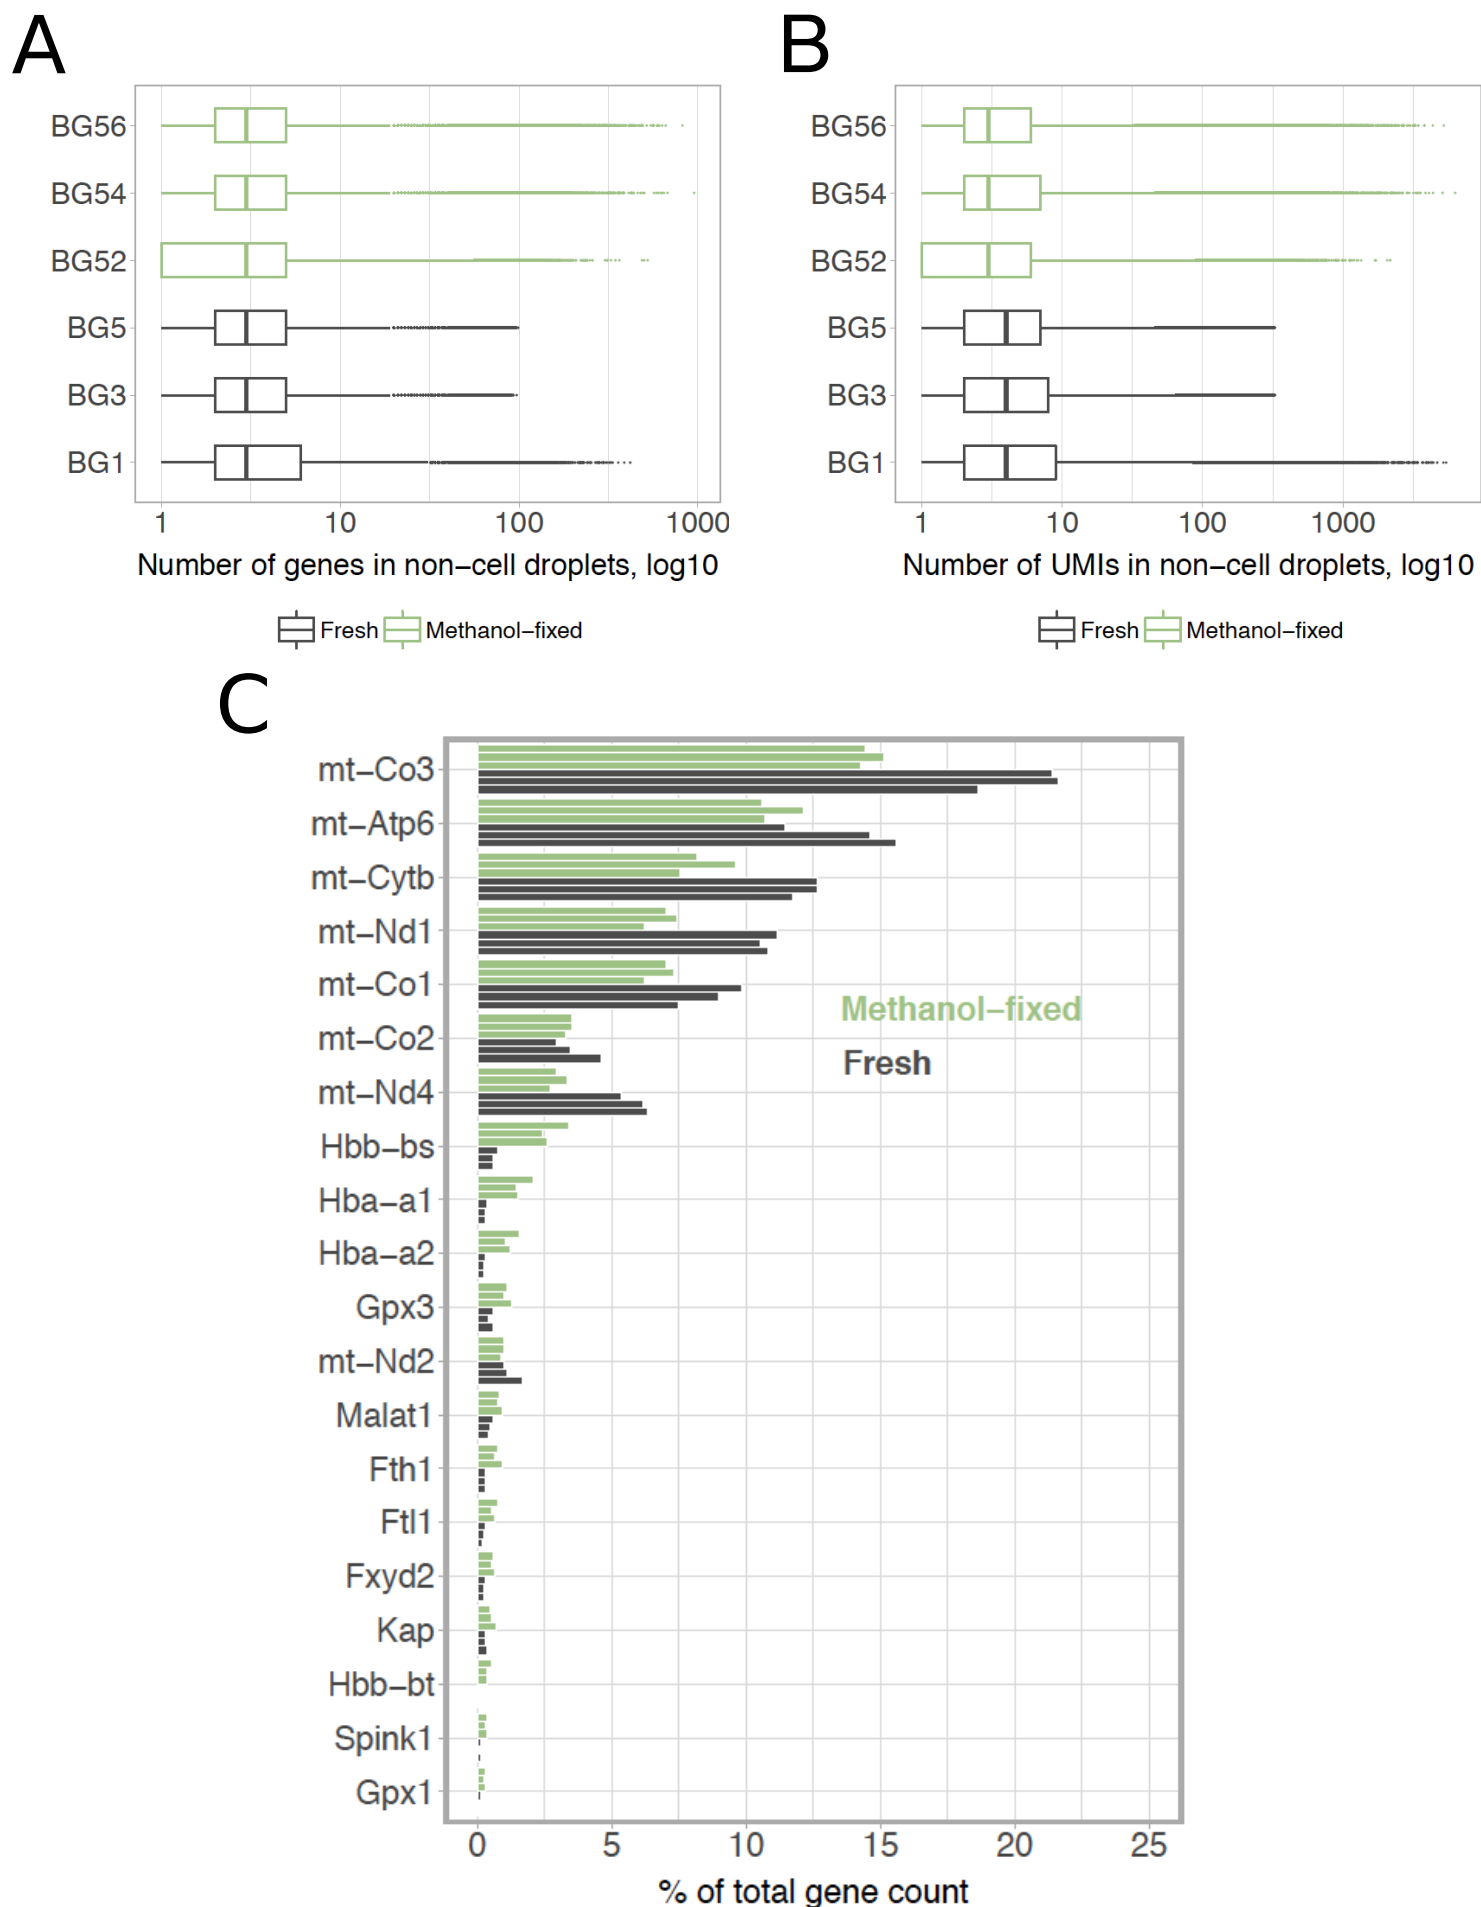

Comparison of ambient RNA contamination in methanol-fixed and freshly profiled aliquots of cold-dissociated samples.

# Fig. S13

## A

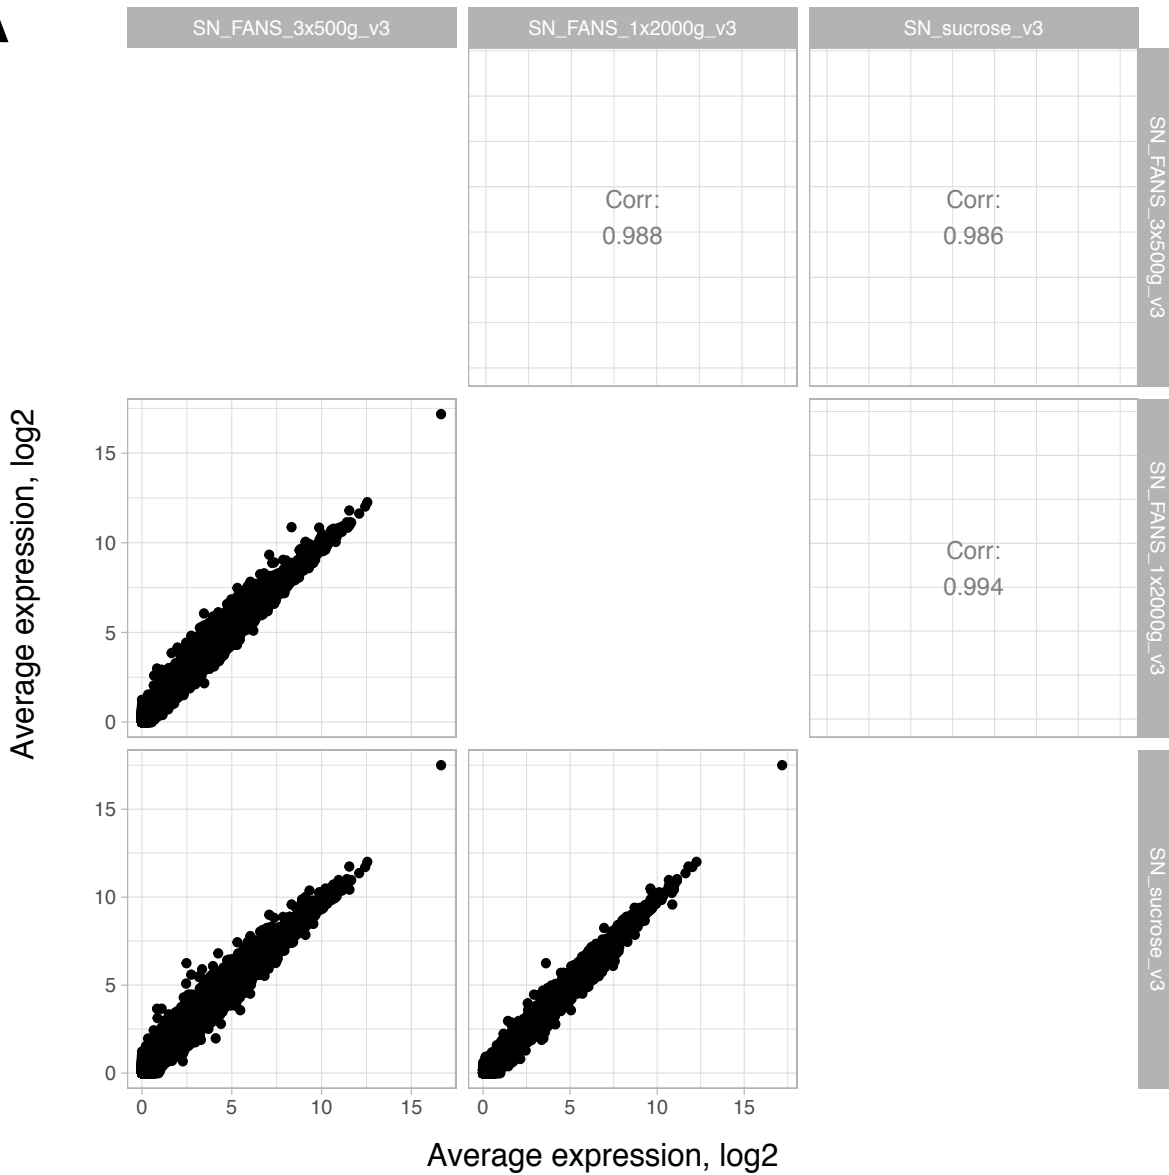

## B

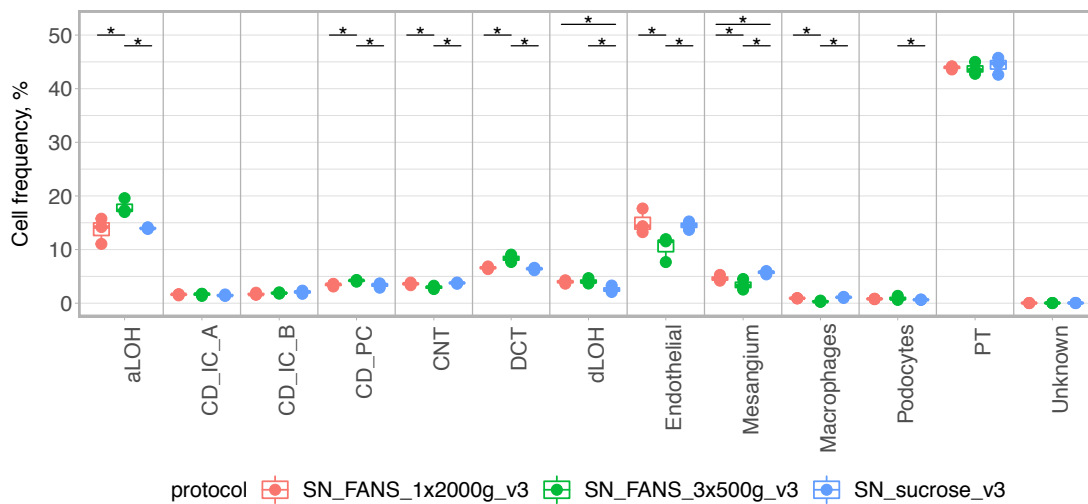

Comparison of nuclei isolation protocols. **a)** Aggregate gene expression and correlation between protocols. Raw counts were summed up for nuclei in each sample separately, then normalised to reads per million, averaged across biological replicates and log<sub>2</sub>-transformed with a pseudo count of 1 for plotting. Spearman correlation coefficients are shown. **b)** Cell type composition of the three nuclei isolation protocols. Three biological replicates are shown per protocol. Asterisks denote two-sided chi-square test p-value < 0.001. aLOH: ascending loop of Henle; CD\_IC\_A: type A intercalated cells of collecting duct; CD\_IC\_B: type B intercalated cells of collecting duct; CD\_PC: principal cells of collecting duct; CNT: connecting tubule; DCT: distal convoluted tubule; dLOH: descending loop of Henle; PT: proximal tubule.

# Fig. S14

## A

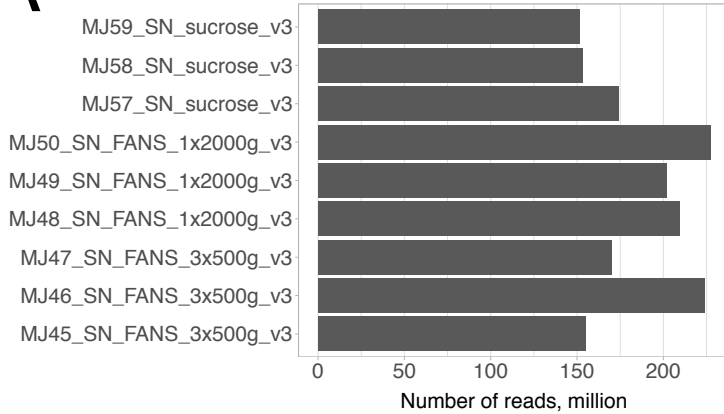

## B

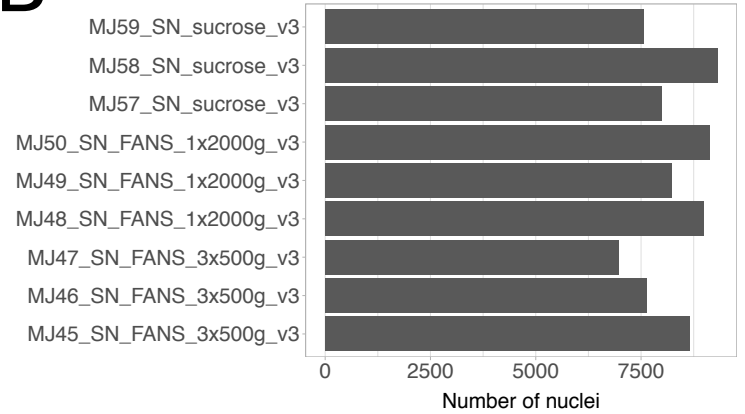

## C

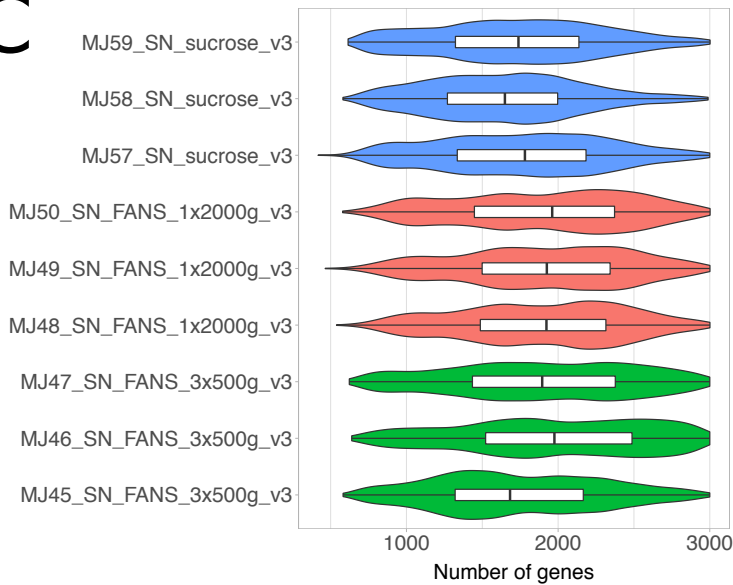

## D

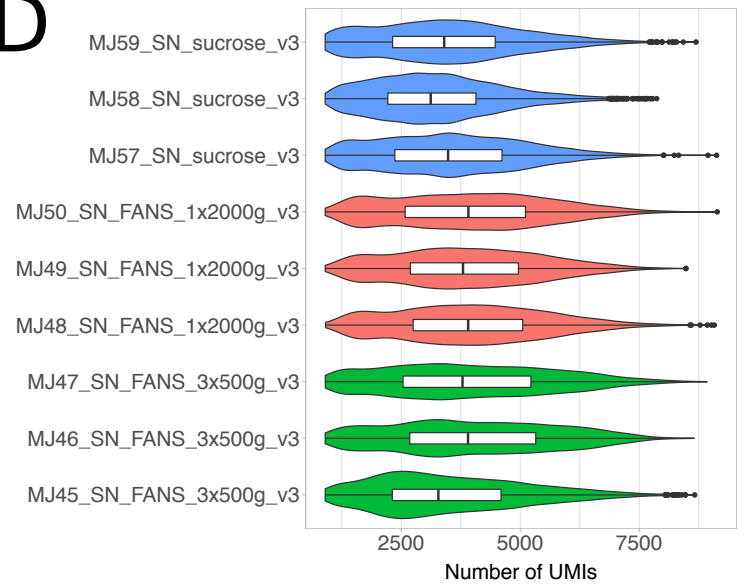

## E

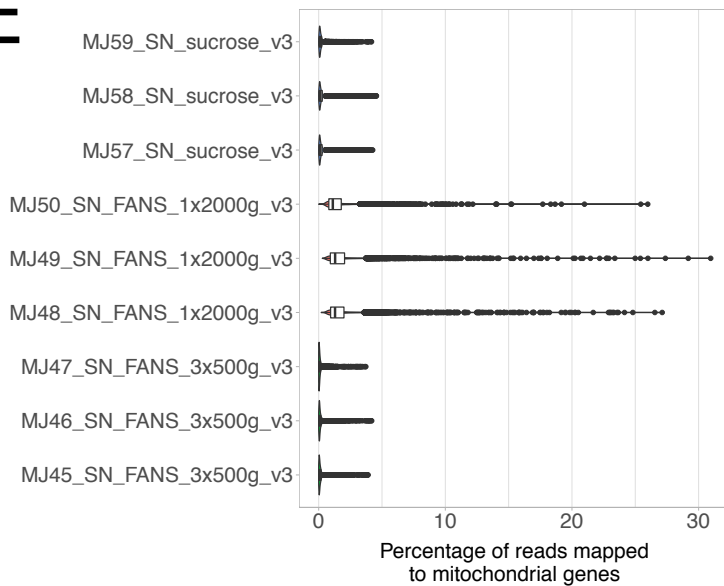

## F

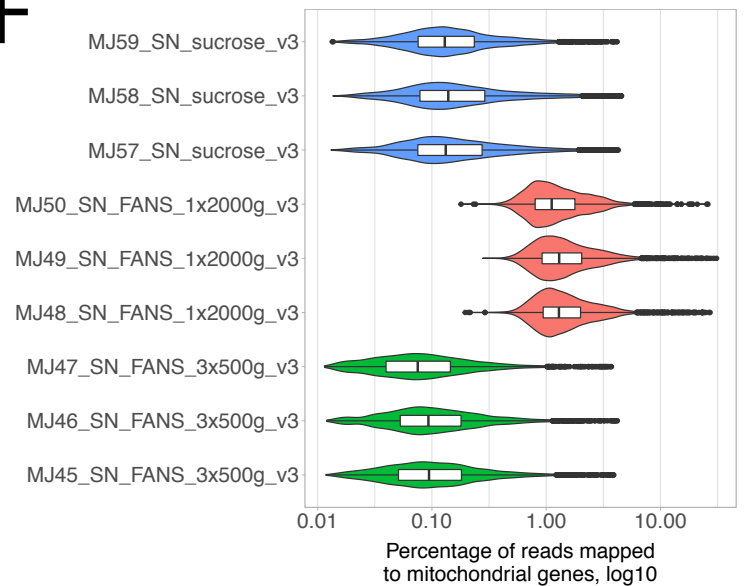

Comparison of nuclei isolation protocols. **a)** Total number of sequenced reads for each library. **b)** Number of nuclei passing all filtering steps as described in **Methods**. **c)** Distribution of the number of genes detected in nuclei. **d)** Distribution of the number of unique molecular identifiers detected in nuclei. **e)**, **f)** Distribution of the percentage of reads mapped to mitochondrial genes.

# Fig. S15

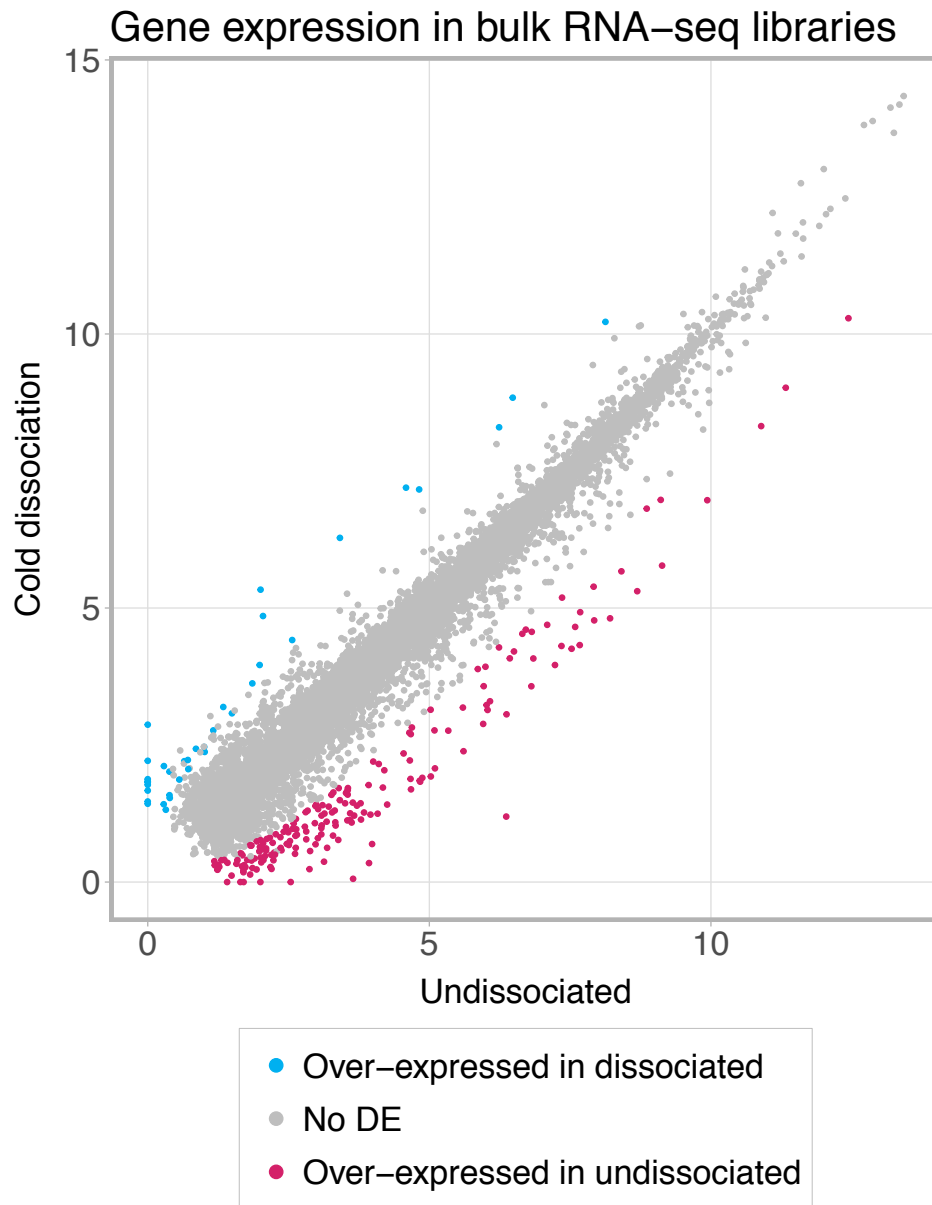

Comparison of bulk RNA-seq profiles of intact kidneys and cold-dissociated single-cell suspensions. GeTMM-normalised counts were averaged across three biological replicates and  $\log_2$ -transformed after adding a pseudo count of 1. DEGs identified with  $FDR < 0.05$  and  $\log_2FC$  threshold of 2 using edgeR exact test are indicated.



# Fig. S16

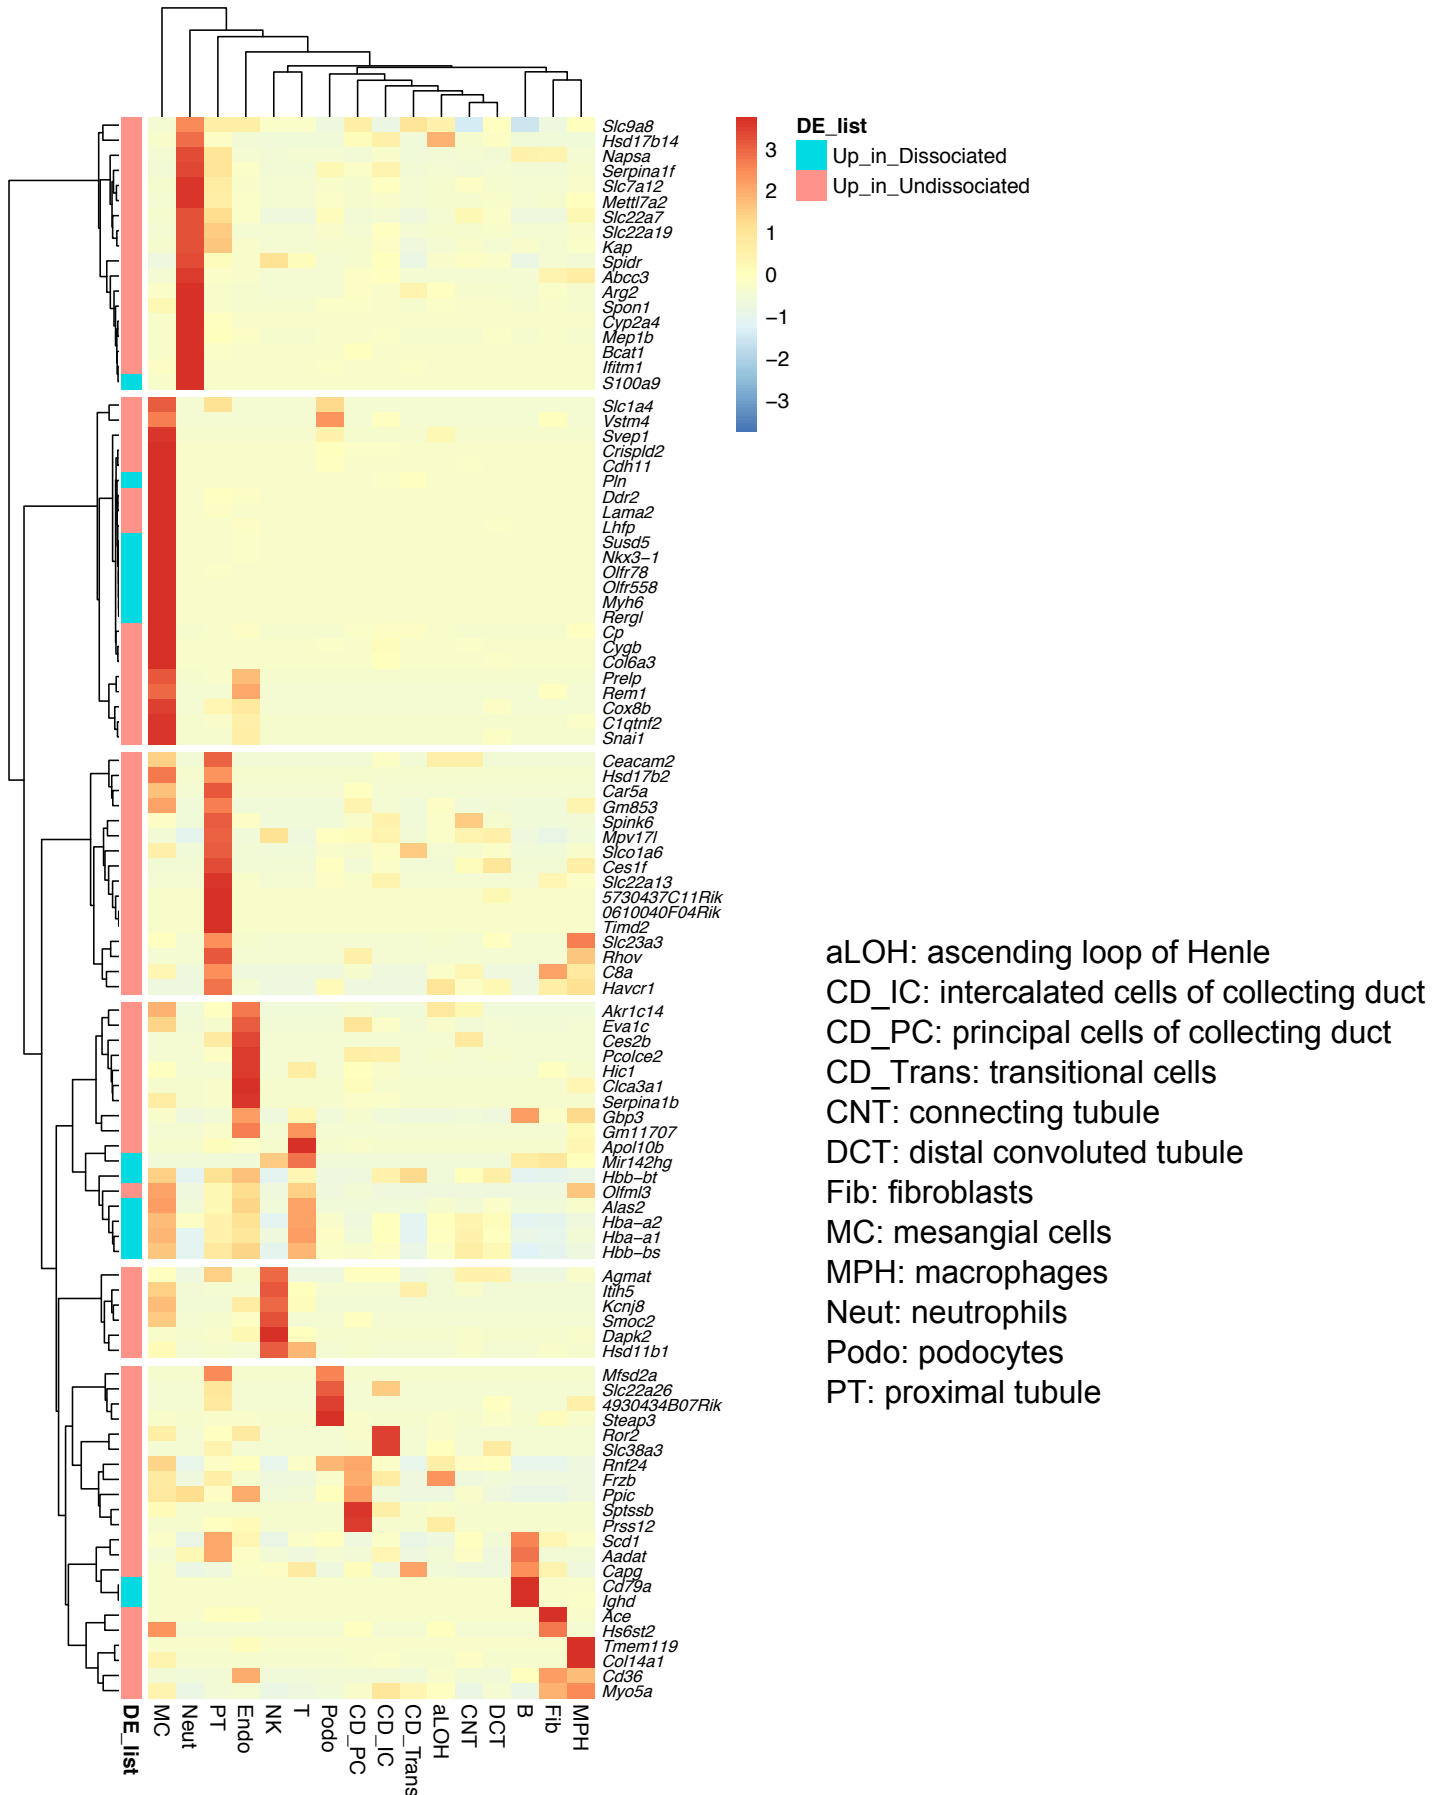

Expression of genes differentially expressed between bulk RNA-seq profiles of intact and dissociated kidneys in the matching single-cell dataset, Balb/c female mice. Normalised counts were averaged for each cell type, rows were scaled for plotting.
